# Supplementary material
Source: publisher site journal article supplement (https://www.dovepress.com/article/489432)
Supplement: Supplementary file 1 [file get_supplementary_file.php]

**Supplementary Table 1.** Baseline Clinicopathologic Characteristics of CRC patients in the adjuvant therapy group

| Clinicopathological  Characteristics | Fn-positivea  n=99 (%) | Fn-negativeb  n=126 (%) | Fn-positive Patient (n =99) | | Fn-negative Patient (n=126) | |
| --- | --- | --- | --- | --- | --- | --- |
| Relapse  n=56 (%) | No relapse  n=43 (%) | Relapse  n=40 (%) | No relapse  n=86 (%) |
| Age |  |  |  |  |  |  |
| <=70 | 89 (43.6) | 115 (56.4) | 49 (55.1) | 40 (44.9) | 37 (32.2) | 78 (67.8) |
| >70 | 10 (47.6) | 11 (52.4) | 7 (70.0) | 3 (30.0) | 3 (27.3) | 8 (72.7) |
| Gender |  |  |  |  |  |  |
| Female | 31 (38.3) | 50 (61.7) | 16 (51.6) | 15 (48.4) | 12 (24.0) | 38 (76.0) |
| Male | 68 (47.2) | 76 (52.8) | 40 (58.8) | 28 (41.2) | 28 (36.8) | 48 (63.2) |
| T stage |  |  |  |  |  |  |
| 1 | 0(0) | 1 (100.0) | - | - | 0 (0) | 1 (100.0) |
| 2 | 12 (42.9) | 16 (57.1) | 4 (33.3) | 8 (66.7) | 5 (31.3) | 11 (68.8) |
| 3 | 15 (34.9) | 28 (65.1) | 10 (66.7) | 5 (33.3) | 10 (35.7) | 18 (64.3) |
| 4 | 72 (47.1) | 81 (52.9) | 42 (58.3) | 30 (41.7) | 25 (30.9) | 56 (69.1) |
| N stage |  |  |  |  |  |  |
| 0 | 39 (39.4) | 60 (60.6) | 12 (30.8) | 27 (69.2) | 13 (21.7) | 47 (78.3) |
| 1 | 35 (44.3) | 44 (55.7) | 22 (62.9) | 13 (37.1) | 16 (36.4) | 28 (63.6) |
| 2 | 25 (53.2) | 22 (46.8) | 22 (88.0) | 3 (12.0) | 11 (50.0) | 11 (50.0) |
| Grade |  |  |  |  |  |  |
| High | 0 | 2 (100) | 0 | 0 | 0 (0) | 2 (100.0) |
| Modc | 68 (43.0) | 90 (57.0) | 40 (58.8) | 28 (41.2) | 27 (30.0) | 63 (70.0) |
| Low | 31 (47.7) | 34 (52.3) | 16 (51.6) | 15 (48.4) | 13 (38.2) | 21 (61.8) |
| Site |  |  |  |  |  |  |
| Right-sided colon | 26 (48.1) | 28 (51.9) | 14 (53.8) | 12 (46.2) | 8 (28.6) | 20 (71.4) |
| Left-sided colon | 27 (40.9) | 39 (59.1) | 13 (48.1) | 14 (51.9) | 12 (30.8) | 27 (69.2) |
| Rectum | 46 (43.8) | 59 (56.2) | 29 (63.0) | 17 (37.0) | 20 (33.9) | 39 (66.1) |
| Adjuvant therapy |  |  |  |  |  |  |
| chemotherapy | 85 (43.8) | 109 (56.2) | 48 (56.5) | 37 (43.5) | 35 (32.1) | 74 (67.9) |
| chemoradiotherapy | 14 (45.2) | 17 (54.8) | 8 (57.1) | 6 (42.9) | 5 (29.4) | 12 (70.6) |

Abbreviations: a Fusobacterium nucleatum positive; b Fusobacterium nucleatum positive; c moderate.

**Supplementary Table 2.** Baseline Clinicopathologic Characteristics of Patients with Surgery Group by Fn DNA test

| Clinicopathological  Characteristics | Fn-positivea  n=38 (%) | Fn-negativeb  n=69 (%) | Fn-positive Patient (n =38) | | Fn-negative Patient (n=69) | |
| --- | --- | --- | --- | --- | --- | --- |
| Relapse  n=7 (%) | No relapse  n=31 (%) | Relapse  n= 18 (%) | No relapse  n=51 (%) |
| Age |  |  |  |  |  |  |
| <=70 | 31 (39.2) | 48 (60.8) | 6 (19.4) | 25 (80.6) | 13 (27.1) | 35 (72.9) |
| >70 | 7 (25.0) | 21 (75.0) | 1 (14.3) | 6 (85.7) | 5 (23.8) | 16 (76.2) |
| Gender |  |  |  |  |  |  |
| Female | 20 (37.0) | 34 (63.0) | 4 (20.0) | 16 (80.0) | 8 (23.5) | 26 (76.5) |
| Male | 18 (34.0) | 35 (66.0) | 3 (16.7) | 15 (83.3) | 10 (28.6) | 25 (71.4) |
| T stage |  |  |  |  |  |  |
| 1 | 3 (42.9) | 4 (57.1) | 0 (0) | 3 (100.0) | 1 (25.0) | 3 (75.0) |
| 2 | 11 (29.7) | 26 (70.3) | 2 (18.2) | 9 (81.8) | 8 (30.8) | 18 (69.2) |
| 3 | 4 (30.8) | 9 (69.2) | 2 (50.0) | 2 (50.0) | 2 (22.2) | 7 (77.8) |
| 4 | 20 (40.0) | 30 (60.0) | 3 (15.0) | 17 (85.0) | 7 (23.3) | 23 (76.7) |
| N stage |  |  |  |  |  |  |
| 0 | 31 (34.1) | 60 (65.9) | 3 (9.7) | 28 (90.3) | 14 (23.3) | 46 (76.7) |
| 1 | 6 (54.5) | 5 (45.5) | 3 (50.0) | 3 (50) | 3 (60.0) | 2 (40.0) |
| 2 | 1 (20.0) | 4 (80.0) | 1 (14.3) | 0 (0) | 1 (25.0) | 3 (74.0) |
| Grade |  |  |  |  |  |  |
| High | 2 (28.6) | 5 (71.4) | 0 (0) | 2 (6.5) | 0 (0) | 5 (100.0) |
| Modc | 28 (37.3) | 47 (62.7) | 5 (17.9) | 23 (82.1) | 12 (25.5) | 35 (74.5) |
| Low | 8 (32.0) | 17 (68.0) | 2 (25.0) | 6 (75.0) | 6 (35.3) | 11 (64.7) |
| Site |  |  |  |  |  |  |
| Right-sided colon | 8 (34.8) | 15 (65.2) | 0 (0) | 8 (100.0) | 5 (33.3) | 10 (66.7) |
| Left-sided colon | 8 (38.1) | 13 (61.9) | 3 (37.5) | 5 (62.5) | 1 (7.7) | 12 (92.3) |
| Rectum | 22 (34.9) | 41 (65.1) | 4 (18.2) | 18 (81.8) | 12 (29.3) | 29 (70.7) |

Abbreviations: a Fusobacterium nucleatum positive; b Fusobacterium nucleatum positive; c moderate.

**Supplementary Table 3.** Baseline Clinicopathologic Characteristics of Patients by Fna DNA test

| Clinicopathological  Characteristics | Fn-positive | Fn-positive Patient | | Fn-negative | Fn-negative Patient | |
| --- | --- | --- | --- | --- | --- | --- |
| Relapse | No relapse | Relapse | No relapse |
| Total cohort |  |  |  |  |  |  |
| All | n=137 (%) | n=63 (%) | n=74 (%) | n= 195 (%) | n=58 (%) | n=137 (%) |
| pre-LMRb |  |  |  |  |  |  |
| High | 52 (38.0) | 14 (26.9) | 38 (73.1) | 10 (5.1) | 1 (10.0) | 9 (90.0) |
| Low | 85 (62.0) | 49 (57.6) | 36 (42.4) | 185 (94.9) | 57 (30.8) | 128 (69.2) |
| pos-LMRc |  |  |  |  |  |  |
| High | 50 (36.5) | 12 (24.0) | 38 (76.0) | 183 (93.8) | 51 (27.9) | 132 (72.1) |
| Low | 87 (63.5) | 51 (58.6) | 36 (41.4) | 12 (6.2) | 7 (58.3) | 5 (41.7) |
| f-LMRd |  |  |  |  |  |  |
| High | 39 (28.5) | 9 (23.1) | 30 (76.9) | 88 (45.1) | 36 (40.9) | 52 (59.1) |
| Low | 65 (47.4) | 52 (80.0) | 13 (20.0) | 22 (11.3) | 16 (72.7) | 6 (27.3) |
| absent | 33 (24.1) |  |  | 85 (43.6) |  |  |
| pr-LMR-po change groupe |  |  |  |  |  |  |
| High-High | 29 (21.2) | 5 (17.2) | 24 (82.8) | 10 (5.1) | 1 (10.0) | 9 (90.0) |
| Low-High | 21 (15.3) | 7 (33.3) | 14 (66.7) | 173 (88.7) | 50 (28.9) | 123 (71.1) |
| High-Low | 23 (16.8) | 9 (39.1) | 14 (60.9) | 0 | 0 | 0 |
| Low-Low | 64 (46.7) | 42 (65.6) | 22 (34.4) | 12 (6.2) | 7 (58.3) | 5 (41.7) |
| pr-LMR-f change groupf |  |  |  |  |  |  |
| normal group | 12 (8.8) | 3 (25.0) | 9 (75.0) | 6 (3.1) | 1 (16.7) | 5 (83.3) |
| first group | 23 (16.8) | 4 (17.4) | 19 (82.6) | 78 (40.0) | 32 (41.0) | 46 (59.0) |
| second group | 24 (17.5) | 16 (66.7) | 8 (33.3) | 22 (11.3) | 16 (72.7) | 6 (27.3) |
| third group | 45 (32.8) | 38 (84.4) | 7 (15.6) | 4 (2.0) | 3 (75.0) | 1 (25.0) |
| absent | 33 (24.1) | - | - | 85 (43.6) | - | - |
| Advjuant Therapy Group |  |  |  |  |  |  |
| All | n=99 (%) | n=56 (%) | n=43 (%) | n=126 (%) | n= 40 (%) | n=86 (%) |
| pre-LMR |  |  |  |  |  |  |
| High | 41 (41.4） | 18 (43.9) | 23 (56.1) | 41 (32.5) | 10 (24.4) | 31 (75.6) |
| Low | 58 (58.6) | 38 (65.5) | 20 (34.5) | 45 (67.5) | 30 (35.3) | 55 (64.7) |
| pos-LMR |  |  |  |  |  |  |
| High | 63 (50.0) | 11 (31.4) | 24 (68.6) | 46 (36.5) | 13 (28.3) | 33 (71.7) |
| Low | 63 (50.0) | 45 (70.3) | 19 (29.7) | 80 (63.5) | 27 (33.8) | 53 (66.3) |
| f-LMR |  |  |  |  |  |  |
| High | 35 (35.4) | 12 (34.3) | 23 (65.7) | 55 (43.7) | 21 (38.2) | 34 (61.8) |
| Low | 49 (49.5) | 43 (87.8) | 6 (12.2) | 28 (22.2) | 11 (39.3) | 17 (60.7) |
| absent | 15 (15.1) | - | - | 43 (34.1) | - | - |
| pr-LMR-po change group |  |  |  |  |  |  |
| High-High | 19 (19.2) | 5 (26.3) | 14 (73.7) | 22 (17.5) | 5 (22.7) | 17 (77.3) |
| Low-High | 16 (16.2) | 6 (37.5) | 10 (62.5) | 24 (19.0) | 8 (33.3) | 16 (66.7) |
| High-Low | 22 (22.2) | 13 (59.1) | 9 (40.9) | 19 (15.1) | 5 (26.3) | 14 (73.7) |
| Low-Low | 42 (42.4) | 32 (76.2) | 10 (23.8) | 61 (48.4) | 22 (36.1) | 39 (63.9) |
| pr-LMR-f change group |  |  |  |  |  |  |
| normal group | 11 (11.1) | 3 (27.3) | 8 (72.7) | 14 (11.1) | 4 (28.6) | 10 (71.4) |
| first group | 21 (21.2) | 6 (28.6) | 15 (71.4) | 24 (19.05) | 9 (37.5) | 15 (62.5) |
| second group | 21 (21.2) | 18 (85.7) | 3 (14.3) | 24 (19.05) | 13 (54.2) | 11 (45.8) |
| third group | 31 (31.3) | 28 (90.3) | 3 (9.7) | 21 (16.7) | 12 (57.1) | 9 (42.9) |
| absent | 15 (15.1) | - | - | 43 (34.1) | - | - |
| Surgery Group |  |  |  |  |  |  |
| All | n=38 (%) | n=7 (%) | n=31 (%) | n=69 (%) | n=18 (%) | n=51 (%) |
| pre-LMR |  |  |  |  |  |  |
| High | 19 (50.0) | 0 (0) | 19 (100.0) | 5 (7.2) | 0 | 5 (100.0) |
| Low | 19 (50.0) | 7 (36.8) | 12 (63.2) | 64 (92.8) | 18 (28.1) | 46 (71.9) |
| pos-LMR |  |  |  |  |  |  |
| High | 27 (71.1) | 2 (7.4) | 25 (92.6) | 31 (44.9) | 4 (12.9) | 27 (87.1) |
| Low | 11 (28.9) | 5 (45.5) | 6 (54.5) | 38 (55.1) | 14 (36.8) | 24 (63.2) |
| f-LMR |  |  |  |  |  |  |
| High | 11 (28.9) | 1 (9.1) | 10 (90.9) | 8 (11.6) | 2 (25.0) | 6 (75.0) |
| Low | 8 (21.1) | 5 (62.5) | 3 (37.5) | 19 (27.5) | 12 (63.2) | 7 (36.8) |
| absent | 19 (50.0) | - | - | 42 (60.9) | - | - |
| pr-LMR-po change group |  |  |  |  |  |  |
| High-High | 18 (47.4) | 0 (0) | 18 (100.0) | 4 (5.8) | 0 | 4 (100) |
| Low-High | 9 (23.7) | 2 (22.2) | 7 (77.8) | 27 (39.1) | 4 (14.8) | 23 (85.2) |
| High-Low | 1 (2.6) | 0 (0) | 1 (100.0) | 1 (1.4) | 0 | 1 (100) |
| Low-Low | 10 (26.3) | 5 (50.0) | 5 (50.0) | 37 (53.6) | 14 (37.8) | 23 (62.2) |
| pr-LMR-f change group |  |  |  |  |  |  |
| normal group | 7 (18.4) | 0 | 7 (100.0) | 2 (2.9) | 0 | 2 (100) |
| first group | 2 (5.3) | 1 (50.0) | 1 (50.0) | 6 (8.7) | 2 (33.3) | 4 (66.7) |
| second group | 4 (10.5) | 1 (25.0) | 3 (75.0) | 6 (8.7) | 2 (33.3) | 4 (66.7) |
| third group | 6 (15.8) | 4 (66.7) | 2 (33.3) | 13 (18.8) | 10 (76.9) | 3 (23.1) |
| absent | 19 (50.0) | - | - | 42 (60.9) | - | - |

Notes: a Fusobacterium nucleatum; b preoperative lymphocyte-to-monocytes ratio; c post-treatment lymphocyte-to-monocytes ratio; d lymphocyte-to-monocytes ratio of pre-end of follow-up; e the dynamic changes of lymphocyte-to-monocytes ratio from preoperative to post-treatment; f the dynamic changes of lymphocyte-to-monocytes ratio from preoperative to post-treatment to pre-end of follow-up.

Abbreviations: Mod, moderate; n, number.

**Supplementary Table 4.** Baseline Characteristics of the Dynamic Changes in pr-LMR-po of the Fn-positivea Patients in the Total cohort

| Variable | pr-LMR-po Change Groupb | | | | | |
| --- | --- | --- | --- | --- | --- | --- |
| Overall  (n=137) | High-High  n (%) | Low-High  n (%) | High-Low  n (%) | Low-Low  n (%) | p-value |
| Age |  |  |  |  |  |  |
| <=70 | 120 | 28 (23.3) | 17 (14.2) | 21 (17.5) | 54 (45.05) | 0.240 |
| >70 | 17 | 1 (5.9) | 4 (23.5) | 2 (11.8) | 10 (58.8) |  |
| Gender |  |  |  |  |  |  |
| Female | 51 | 15 (29.4) | 6 (11.8) | 10 (19.6) | 20 (39.2) | 0.093 |
| Male | 86 | 14 (16.3) | 15 (17.4) | 13 (15.1) | 44 (51.2) |  |
| T stage |  |  |  |  |  |  |
| 1 | 3 | 1 (33.3) | 0 | 1 (33.3) | 1 (33.3) | 0.123 |
| 2 | 23 | 9 (39.1) | 2 (10.5) | 6 (26.1) | 6 (26.1) |  |
| 3 | 19 | 2 (10.5) | 2 (10.5) | 4 (21.1) | 11 (57.9) |  |
| 4 | 92 | 17 (18.5) | 17 (18.5) | 12 (13.0) | 46 (50.0) |  |
| N stage |  |  |  |  |  |  |
| 0 | 70 | 19 (27.1) | 10 (14.3) | 12 (17.1) | 29 (41.4) | 0.445 |
| 1 | 41 | 8 (19.5) | 5 (12.2) | 7 (17.1) | 21 (51.2) |  |
| Grade |  |  |  |  |  |  |
| High | 11 | 4 (36.4) | 1 (9.1) | 2 (18.2) | 4 (36.4) | 0.792 |
| Mod | 87 | 18 (20.7) | 12 (13.8) | 16 (18.4) | 41 (47.1) |  |
| Low | 39 | 7 (17.9) | 8 (20.5) | 5 (12.8) | 19 (48.7) |  |
| Site |  |  |  |  |  |  |
| Right-sided colon | 34 | 7 (20.6) | 8 (23.5) | 3 (8.8) | 16 (47.1) | 0.042 |
| Left-sided colon | 35 | 5 (14.3) | 8 (22.9) | 3 (8.6) | 19 (54.3) |  |
| Rectum | 68 | 17 (25.0) | 5 (7.4) | 17 (25.0) | 29 (42.6) |  |
| Adjuvant therapy |  |  |  |  |  |  |
| Yes | 99 | 18 (18.2) | 17 (17.2) | 15 (15.2) | 49 (49.5) | 0.338 |
| No | 38 | 11 (28.9) | 4 (10.5) | 8 (21.1) | 15 (39.5) |  |

Notes: a Fusobacterium nucleatum positive; b the dynamic lymphocyte-to-monocyte ratio changes from preoperative to post-treatment.

**Supplementary Table 5.** Baseline Characteristics of the Dynamic Changes in pr-LMR-po of Fn-positivea Patients in the Adjuvant Therapy Group

| Variable | pr-LMR-po change groupb | | | | | |
| --- | --- | --- | --- | --- | --- | --- |
| Overall  (n=99) | High-High  n (%) | Low-High  n (%) | High-Low  n (%) | Low-Low  n (%) | p-value |
| Age |  |  |  |  |  |  |
| <=70 | 89 | 19 (21.3) | 13 (14.6) | 22 (24.7) | 35 (39.3) | 0.013 |
| >70 | 10 | 0 | 3 (30.0) | 0 | 7 (70.0) |  |
| Gender |  |  |  |  |  |  |
| Female | 31 | 7 (22.6) | 5 (16.1) | 8 (25.8) | 11 (35.5) | 0.809 |
| Male | 68 | 12 (17.6) | 11 (16.2) | 14 (20.6) | 31 (45.6) |  |
| T stage |  |  |  |  |  |  |
| 1 | 0 | - | - | - | - | 0.05 |
| 2 | 12 | 6 (50.0) | 1 (8.3) | 3 (25.0) | 2 (16.7) |  |
| 3 | 15 | 2 (13.3) | 1 (6.7) | 6 (40.0) | 6 (40.0) |  |
| 4 | 72 | 11 (15.3) | 14 (19.4) | 13 (18.1) | 34 (47.2) |  |
| N stage |  |  |  |  |  |  |
| 0 | 39 | 10 (25.6) | 6 (15.4) | 9 (23.1) | 14 (35.9) | 0.697 |
| 1 | 35 | 7 (20.0) | 5 (14.3) | 8 (22.9) | 15 (42.9) |  |
| 2 | 25 | 2 (8.0) | 5 (20.0) | 5 (20.0) | 13 (52.0) |  |
| Grade |  |  |  |  |  |  |
| High | 7 | 2 (28.6) | 1 (14.3) | 2 (28.6) | 2 (28.6) | 0.955 |
| Mod | 61 | 10 (16.4) | 10 (16.4) | 14 (23.0) | 27 (44.3) |  |
| Low | 31 | 7 (22.6) | 5 (16.1) | 6 (19.4) | 13 (41.9) |  |
| Site |  |  |  |  |  |  |
| Right-sided colon | 26 | 5 (19.2) | 6 (23.1) | 3 (11.5) | 12 (46.2) | 0.130 |
| Left-sided colon | 27 | 3 (11.1) | 7 (25.9) | 5 (18.5) | 12 (44.4) |  |
| Rectum | 46 | 11 (23.9) | 3 (6.5) | 14 (30.5) | 18 (39.1) |  |
| Adjuvant therapy |  |  |  |  |  |  |
| Chemotherapy | 85 | 17 (20.0) | 16 (18.8) | 14 (16.5) | 38 (44.7) | 0.009 |
| Chemoradiotherapy | 14 | 2 (14.3) | 0 (0) | 8 (57.1) | 4 (28.6) |  |

Notes: a Fusobacterium nucleatum positive; b the dynamic lymphocyte-to-monocyte ratio changes from preoperative to post-treatment.

**Supplementary Table 6.** Baseline Characteristics of the Dynamic Changes in pr-LMR-f of Fn-positivea Patients in the Total Cohort

| Characteristics | pr-LMR-f change groupb | | | | | |
| --- | --- | --- | --- | --- | --- | --- |
| Overall  n=104 | Normal group  n (%) | First group  n (%) | Second group  n (%) | Third group  n (%) | p-value |
| Age |  |  |  |  |  |  |
| <=70 | 89 | 11 (12.4) | 20 (22.5) | 20 (22.5) | 38 (42.7) | 0.977 |
| >70 | 15 | 1 (6.7) | 3 (20.0) | 4 (26.7) | 7 (46.7) |  |
| Gender |  |  |  |  |  |  |
| Female | 32 | 6 (18.8) | 9 (28.1) | 4 (12.5) | 13 (40.6) | 0.159 |
| Male | 72 | 6 (8.3) | 14 (19.4) | 20 (27.8) | 32 (44.4) |  |
| T stage |  |  |  |  |  |  |
| 1 | 1 | 0 | 0 | 1 (100.0) | 0 | 0.060 |
| 2 | 16 | 5 (31.3) | 5 (31.3) | 3 (18.8) | 3 (18.8) |  |
| 3 | 15 | 0 | 4 (26.7) | 2 (13.3) | 9 (60.0) |  |
| 4 | 72 | 7 (9.7) | 14 (19.4) | 18 (25.0) | 33 (45.8) |  |
| N stage |  |  |  |  |  |  |
| 0 | 47 | 7 (14.9) | 14 (29.8) | 11 (23.4) | 15 (31.9) | 0.199 |
| 1 | 33 | 4 (12.1) | 7 (21.2) | 6 (18.2) | 16 (48.5) |  |
| 2 | 24 | 1 (4.2) | 2 (8.3) | 7 (29.2) | 14 (58.3) |  |
| Grade |  |  |  |  |  |  |
| High | 8 | 3 (37.5) | 1 (12.5) | 1 (12.5) | 3 (37.5) | 0.394 |
| Mod | 71 | 7 (9.9) | 18 (25.4) | 15 (21.1) | 31 (43.7) |  |
| Low | 25 | 2 (8.0) | 4 (16.0) | 8 (32.0) | 11 (44.0) |  |
| Site |  |  |  |  |  |  |
| Right colon | 25 | 3 (12.0) | 7 (28.0) | 6 (24.0) | 9 (36.0) | 0.817 |
| Left colon | 28 | 2 (7.1) | 4 (14.3) | 7 (25.0) | 15 (53.6) |  |
| Rectum | 51 | 7 (13.7) | 12 (23.5) | 11 (21.6) | 21 (41.2) |  |
| CEA |  |  |  |  |  |  |
| Low | 47 | 6 (12.8) | 14 (29.8) | 10 (21.3) | 17 (36.2) | 0.078 |
| High | 40 | 3 (7.5) | 4 (10.0) | 11 (27.5) | 22 (55.0) |  |
| Unknown | 17 | - | - | - | - |  |

Notes: a Fusobacterium nucleatum positive; b the dynamic lymphocyte-to-monocyte ratio changes from preoperative to post-treatment.

**Supplementary Table 7.** Baseline Characteristics of the Dynamic Changes in p-LMR-f of Fn-positivea CRC Patients in the Adjuvant Therapy Group

| Characteristics | pr-LMR-f change groupb | | | | | |
| --- | --- | --- | --- | --- | --- | --- |
| Overall  (n=84) | Normal group  n (%) | First group  n (%) | Second group  n (%) | Third group  n (%) | p-value |
| Age |  |  |  |  |  |  |
| <=70 | 74 | 11 (14.9) | 19 (25.7) | 19 (25.7) | 25 (33.8) | 0.419 |
| >70 | 10 | 0 | 2 (20.0) | 2 (20.0) | 6 (60.0) |  |
| Gender |  |  |  |  |  |  |
| Female | 25 | 5 (20.0) | 7 (28.0) | 4 (16.0) | 9 (36.0) | 0.459 |
| Male | 59 | 6 (10.2) | 14 (23.7) | 17 (28.8) | 22 (37.3) |  |
| T stage |  |  |  |  |  |  |
| 1 | 0 | - | - | - | - | 0.004 |
| 2 | 11 | 6 (54.5) | 3 (27.3) | 0 | 2 (18.2) |  |
| 3 | 12 | 0 | 4 (23.0) | 4 (23.0) | 4 (23.0) |  |
| 4 | 61 | 5 (8.2) | 14 (23.0) | 17 (27.9) | 25 (41.0) |  |
| N stage |  |  |  |  |  |  |
| 0 | 30 | 6 (20.0) | 10 (33.3) | 7 (23.3) | 7 (23.3) | 0.245 |
| 1 | 31 | 4 (12.9) | 8 (25.8) | 7 (22.6) | 12 (38.7) |  |
| 2 | 23 | 1 (4.3) | 3 (13.0) | 7 (30.4) | 12 (52.2) |  |
| Grade |  |  |  |  |  |  |
| High | 7 | 2 (28.6) | 1 (14.3) | 2 (28.6) | 2 (28.6) | 0.816 |
| Mod | 55 | 6 (10.9) | 16 (29.1) | 13 (23.6) | 20 (36.4) |  |
| Low | 22 | 3 (13.6) | 4 (18.2) | 6 (27.3) | 9 (40.9) |  |
| Site |  |  |  |  |  |  |
| Right colon | 21 | 2 (9.5) | 8 (38.1) | 4 (19.0) | 7 (33.3) | 0.799 |
| Left colon | 23 | 3 (13.0) | 5 (21.7) | 5 (21.7) | 10 (43.5) |  |
| Rectum | 40 | 6 (15.0) | 8 (20.0) | 12 (30.0) | 14 (35.0) |  |
| CEA |  |  |  |  |  |  |
| Low | 37 | 5 (13.5) | 14 (37.8) | 7 (18.9) | 11 (29.7) | 0.016 |
| High | 35 | 3 (8.6) | 3 (8.6) | 11 (31.4) | 18 (51.4) |  |
| Unknown | 12 | - | - | - | - |  |

Notes: a Fusobacterium nucleatum positive; b the dynamic lymphocyte-to-monocyte ratio changes from preoperative to post-treatment.

**Supplementary** **Table 8.** Univariate Cox Proportional-hazard Regression Analysis of Patients’ Recurrence-free Survival

| Characteristics | Univariate Analysis | | | | | |
| --- | --- | --- | --- | --- | --- | --- |
| Total cohort | | Adjuvant Therapy Group | | Surgery Group | |
| HR (95% CI) | p-value | HR (95% CI) | p-value | HR (95% CI) | p-value |
| Age |  |  |  |  |  |  |
| <=70 | 1 (Referent) |  | 1 (Referent) |  | 1 (Referent) |  |
| >70 | 0.852 (0.503-1.442) | 0.551 | 1.188 (0.617-2.286) | 0.607 | 0.870 (0.348-2.180) | 0.767 |
| Gender |  |  |  |  |  |  |
| Female | 1 (Referent) |  | 1 (Referent) |  | 1 (Referent) |  |
| Male | 1.518 (1.039-2.217) | 0.031 | 1.493 (0.961-2.320) | 0.074 | 1.106 (0.504-2.423) | 0.802 |
| T stage |  |  |  |  |  |  |
| 4 | 1 (Referent) |  | 1 (Referent) |  | 1 (Referent) |  |
| 3 | 1.150 (0.727-1.819) | 0.550 | 1.068 (0.648-1.761) | 0.795 | 1.554 (0.487-4.955) | 0.456 |
| 2 | 0.656 (0.397-1.084) | 0.100 | 0.594 (0.296-1.192) | 0.143 | 1.358 (0.565-3.263) | 0.494 |
| 1 | 0.274 (0.038-1.972) | 0.199 | 0 | - | 0.698 (0.089-5.453) | 0.732 |
| N stage |  |  |  |  |  |  |
| 0 | 1 (Referent) |  | 1 (Referent) |  | 1 (Referent) |  |
| 1 | 2.713 (1.777-4.143) | <0.001 | 2.303 (1.389-3.817) | 0.001 | 3.335 (1.312-8.474) | 0.011 |
| 2 | 4.567 (2.911-7.165) | <0.001 | 4.259 (2.527-7.177) | <0.001 | 2.212 (0.510-9.586) | 0.289 |
| Grade |  |  |  |  |  |  |
| Low | 1 (Referent) |  | 1 (Referent) |  | 1 (Referent) |  |
| Mod | 1.154 (0.503-2.646) | 0.736 | 0.618 (0.267-1.431) | 0.261 | 0.685 (0.296-1.588) | 0.378 |
| High | 1.338 (0.564-3.175) | 0.509 | 0.654 (0.270-1.580) | 0.345 | 0 | 0.976 |
| Site |  |  |  |  |  |  |
| Right colon | 1 (Referent) |  | 1 (Referent) |  | 1 (Referent) |  |
| Left colon | 0.921 (0.545-1.556) | 0.759 | 0.888 (0.501-1.575) | 0.685 | 0.855 (0.230-3.186) | 0.816 |
| Rectum | 1.068 (0.682-1.673) | 0.774 | 1.139 (0.689-1.883) | 0.613 | 1.123 (0.411-3.066) | 0.821 |
| Adjuvant therapy |  |  | - |  | - |  |
| No | 1 (Referent) |  |  |  |  |  |
| Yes | 2.169 (1.396-3.369) | 0.001 |  |  |  |  |
| Fna | 1.796 (1.257-2.566) | 0.001 | 2.246 (1.496-3.371) | <0.001 | 0.668 (0.279-1.599) | 0.365 |
| pre-LMRb | 0.607 (0.418-0.881) | 0.009 | 0.643 (0.408-1.015) | 0.058 | 0.684 (0.450-1.039) | 0.075 |
| pos-LMRc | 0.533 (0.356-0.798) | 0.002 | 0.532 (0.347-0.816) | 0.004 | 0.661 (0.435-1.004) | 0.052 |
| pr-LMR-po change groupd |  |  |  |  |  |  |
| High-High | 1 (Referent) |  | 1 (Referent) |  | 1 (Referent) |  |
| Low-High | 1.567 (0.784-3.134) | 1.567 | 1.889 (0.905-3.943) | 0.090 | 2.706 (0.496-14.776) | 0.250 |
| High-Low | 1.806 (0.973-3.351) | 0.061 | 2.715 (1.232-5.983) | 0.013 | 5.919 (1.194-29.344) | 0.029 |
| Low-Low | 2.597 (1.499-4.500) | 0.001 | 2.697 (1.405-5.176) | 0.003 | 7.772 (1.753-34.460) | 0.007 |

Notes: a Fusobacterium nucleatum; b preoperative lymphocyte-to-monocytes ratio; c post-treatment lymphocyte-to-monocytes ratio; d the dynamic lymphocyte-to-monocyte ratio changes from preoperative to post-treatment.

Abbreviations: HR: hazard ratio; CI: confidence interval.

**Supplementary Table 9.** Multivariate Cox Proportional-hazard Regression Analysis of Patients’ Recurrence-free Survival

| Characteristics | Multivariate Analysis | | | |
| --- | --- | --- | --- | --- |
| Total cohort | | Adjuvant Therapy Group | |
| HR (95% CI) | p-value | HR (95% CI) | p-value |
| pre-LMRa |  |  |  |  |
| Gender |  |  | - |  |
| Female | 1 (Referent) |  |  |  |
| Male | 1.365 (0.932-1.999) | 0.110 |  |  |
| N stage |  |  | - |  |
| 0 | 1 (Referent) |  |  |  |
| 1 | 2.448 (1.576-3.805) | <0.001 |  |  |
| 2 | 4.057 (2.546-6.465) | <0.001 |  |  |
| Adjuvant therapy |  |  | - |  |
| No | 1 (Referent) |  |  |  |
| Yes | 1.403 (0.884-2.228) | 0.151 |  |  |
| pre-LMR | 1.534 (1.054-2.233) | 0.025 | - |  |
| pos-LMRb |  |  |  |  |
| Gender |  |  | - |  |
| Female | 1 (Referent) |  |  |  |
| Male | 1.322 (0.901-1.939) | 0.153 |  |  |
| N stage |  |  |  |  |
| 0 | 1 (Referent) |  | 1 (Referent) |  |
| 1 | 2.376 (1.525-3.703) | <0.001 | 2.298 (1.387-3.810) | 0.001 |
| 2 | 3.9 (2.432-6.254) | <0.001 | 3.985 (2.359-6.734) | <0.001 |
| Adjuvant therapy |  |  | - |  |
| No | 1 (Referent) |  |  |  |
| Yes | 1.574 (0.981-2.523) | 0.060 |  |  |
| pos-LMR | 1.938 (1.285-2.924) | 0.002 | 1.715 (1.114-2.640) | 0.014 |
| Fnc |  |  |  |  |
| Gender |  |  | - |  |
| Female | 1 (Referent) |  |  |  |
| Male | 1.367 (0.933-2.001) | 0.108 |  |  |
| N stage |  |  |  |  |
| 0 | 1 (Referent) |  | 1 (Referent) |  |
| 1 | 2.335 (1.499-3.639) | <0.001 | 2.286 (1.379-3.79) | 0.001 |
| 2 | 4.135 (2.583-6.618) | <0.001 | 4.265 (2.528-7.198) | <0.001 |
| Adjuvant therapy |  |  |  |  |
| No | 1 (Referent) |  |  |  |
| Yes | 1.386 (0.869-2.212) | 0.171 |  |  |
| Fn | 1.733 (1.21-2.481) | 0.003 | 2.24 (1.491-3.366) | <0.001 |

Notes: a preoperative lymphocyte-to-monocytes ratio; b post-treatment lymphocyte-to-monocytes ratio; c Fusobacterium nucleatum.

Abbreviations: HR: hazard ratio; CI: confidence interval.

**Supplementary Table 10.** Multivariate Cox Proportional-hazard Regression Analysis of Patients’ Recurrence-free Survival

| Characteristics | Multivariate Analysis | | | | | |
| --- | --- | --- | --- | --- | --- | --- |
| Total cohort | | Adjuvant Therapy Group | | Surgery Group | |
| HR (95% CI) | p-value | HR (95% CI) | p-value | HR (95% CI) | p-value |
| pr-LMR-po change groupa |  |  |  |  |  |  |
| Gender |  |  | - |  | - |  |
| Female | 1 (Referent) |  |  |  |  |  |
| Male | 1.284 (0.871-1.891) | 0.207 |  |  |  |  |
| N stage |  |  |  |  |  |  |
| 0 | 1 (Referent) |  | 1 (Referent) |  | 1 (Referent) |  |
| 1 | 2.425 (1.560-3.771) | <0.001 | 2.424 (1.452-4.047) | 0.001 | 2.349 (0.902-6.115) | 0.080 |
| 2 | 3.914 (2.440-6.278) | <0.001 | 3.944 (2.331-6.672) | <0.001 | 1.689 (0.383-7.451) | 0.489 |
| Adjuvant therapy |  |  | - |  | - |  |
| No | 1 (Referent) |  |  |  |  |  |
| Yes | 1.544 (0.964-2.474) | 0.071 |  |  |  |  |
| pr-LMR-po change group |  |  |  |  |  |  |
| High-High | 1 (Referent) |  | 1 (Referent) |  | 1 (Referent) |  |
| Low-High | 1.478 (0.735-2.973) | 0.273 | 1.802 (0.858-3.783) | 0.120 | 2.423 (0.438-13.389) | 0.310 |
| High-Low | 1.927 (1.027-3.617) | 0.041 | 2.068 (0.933-4.585) | 0.074 | 5.313 (1.054-26.797) | 0.043 |
| Low-Low | 2.543 (1.456-4.442) | 0.001 | 2.536 (1.310-4.907) | 0.006 | 6.406 (1.410-29.098) | 0.016 |

Notes: a The dynamic changes of lymphocyte-to-monocytes ratio from preoperative to post-treatment.

Abbreviations: HR: hazard ratio; CI: confidence interval.

**Supplementary Table 11.** Univariate Cox Proportional-hazard Regression Analysis of Fn-positive Patients’ Recurrence-free Survival

| Characteristics | Univariate Analysis | | | | | |
| --- | --- | --- | --- | --- | --- | --- |
| Total cohort | | Adjuvant Therapy Group | | Surgery Group | |
| HR (95% CI) | p-value | HR (95% CI) | p-value | HR (95% CI) | p-value |
| Fn-positivea |  |  |  |  |  |  |
| Age |  |  |  |  |  |  |
| <=70 | 1 (Referent) |  | 1 (Referent) |  | 1 (Referent) |  |
| >70 | 0.988(0.471-2.074) | 0.974 | 1.360(0.616-3.006) | 0.447 | 0.683(0.082-5.673) | 0.724 |
| Gender |  |  |  |  |  |  |
| Female | 1 (Referent) |  | 1 (Referent) |  | 1 (Referent) |  |
| Male | 1.413(0.831-2.402) | 0.202 | 1.216(0.681-2.172) | 0.509 | 0.820(0.1183-3.663) | 0.795 |
| T stage |  |  |  |  |  |  |
| 4 | 1 (Referent) |  | 1 (Referent) |  | 1 (Referent) |  |
| 3 | 1.478(0.781-2.797) | 0.230 | 1.203(0.603-2.4) | 0.6 | 5.008(0.830-30.228) | 0.079 |
| 2 | 0.415(0.177-0.973) | *0.043* | 0.425(0.152-1.186) | 0.102 | 1.188(0.199-7.114) | 0.850 |
| 1 | 0 | 0.969 | 0 | 0 | 0 | 0.991 |
| N stage |  |  |  |  |  |  |
| 0 | 1 (Referent) |  | 1 (Referent) |  | 1 (Referent) |  |
| 1 | 3.764(1.980-7.152) | <0.001 | 2.645(1.307-5.353) | <0.001 | 5.913(1.190-29.380) | 0.030 |
| 2 | 8.697(4.485-16.866) | <0.001 | 5.785(2.832-11.816) | <0.001 | 11.907(1.198-118.344) | 0.035 |
| Grade |  |  |  |  |  |  |
| Low | 1 (Referent) |  | 1 (Referent) |  | 1 (Referent) |  |
| Mod | 1.135(0.652-1.975) | 0.656 | 1.348(0.747-2.430) | 0.321 | 0.851(0.165-4.391) | 0.847 |
| High | 0.862(0.292-2.549) | 0.788 | 1.445(0.482-4.332) | 0.511 | 0 | 0.986 |
| Site |  |  |  |  |  |  |
| Rectum | 1 (Referent) |  | 1 (Referent) |  | 1 (Referent) |  |
| Left colon | 0.937(0.515-1.702) | 0.830 | 0.677(0.352-1.303) | 0.243 | 2.582(0.576-11.582) | 0.215 |
| Right colon | 0.893(0.478-1.668) | 0.722 | 0.892(0.471—1.688) | 0.725 | 0 | 0.975 |
| Adjuvant therapy |  |  | - |  | - |  |
| No | 1 (Referent) |  |  |  |  |  |
| Yes | 4.215(1.919-9.259) | <0.001 |  |  |  |  |
| pre-LMRb | 2.761(1.523-5.007) | 0.001 | 0.525(0.299-0.920) | 0.024 | 0.012(0-5.721) | 0.161 |
| pos-LMRc | 3.213(1.711-6.033) | <0.001 | 0.315(0.163-0.611) | 0.001 | 0.128(0.025-0.660) | 0.014 |
| pr-LMR-po change groupd |  |  |  |  |  |  |
| High-High | 1 (Referent) |  | 1 (Referent) |  | 1 (Referent) |  |
| Low-High | 2.204(0.699-6.945) | 0.177 | 1.636(0.499-5.364) | 0.416 | 98263 (0-2.438E+133) | 0.939 |
| High-Low | 2.665(0.893-7.953) | 0.079 | 2.934(1.045-8.244) | 0.041 | 1 | 1 |
| Low-Low | 5.670(2.239-14.355) | <0.001 | 4.751(1.847-12.224) | 0.001 | 277902(0-6.881E+133) | 0.934 |

Notes: a Fusobacterium nucleatum positive; b preoperative lymphocyte-to-monocytes ratio; c post-treatment lymphocyte-to-monocytes ratio; d the dynamic changes of lymphocyte-to-monocytes ratio from preoperative to post-treatment.

Abbreviations: HR: hazard ratio; CI: confidence interval.

**Supplementary Table 12.** Univariate Cox Proportional-hazard Regression Analysis of Fn-negative Patients’ Recurrence-free Survival

| Characteristics | Univariate Analysis | | | | | |
| --- | --- | --- | --- | --- | --- | --- |
| Total cohort | | Adjuvant Therapy Group | | Surgery Group | |
| HR (95% CI) | p-value | HR (95% CI) | p-value | HR (95% CI) | p-value |
| Fn-negativea |  |  |  |  |  |  |
| Age |  |  |  |  |  |  |
| <=70 | 1 (Referent) |  | 1 (Referent) |  | 1 (Referent) |  |
| >70 | 0.798 (0.378-1.683) | 0.553 | 0.860 (0.265-2.790) | 0.802 | 0.874 (0.312-2.453) | 0.798 |
| Gender |  |  |  |  |  |  |
| Female | 1 (Referent) |  | 1 (Referent) |  | 1 (Referent) |  |
| Male | 1.548 (0.901-2.660) | 0.114 | 1.657 (0.842-3.259) | 0.144 | 1.241 (0.490-3.144) | 0.650 |
| T stage |  |  |  |  |  |  |
| 4 | 1 (Referent) |  | 1 (Referent) |  | 1 (Referent) |  |
| 3 | 1.128 (0.581-2.190) | 0.722 | 1.208 (0.580-2.516) | 0.613 | 0.835 (0.173-4.019) | 0.822 |
| 2 | 0.978 (0.513-1.863) | 0.946 | 0.873 (0.334-2.281) | 0.782 | 1.305 (0.473-3.599) | 0.607 |
| 1 | 0.646 (0.088-4.726) | 0.667 | 0 | 0.978 | 1.089 (0.134-8.852) | 0.937 |
| N stage |  |  |  |  |  |  |
| 0 | 1 (Referent) |  | 1 (Referent) |  | 1 (Referent) |  |
| 1 | 1.999 (1.111-3.596) | 0.021 | 1.933 (0.929-4.020) | 0.078 | 2.992 (0.858-10.440) | 0.086 |
| 2 | 2.396 (1.214-4.732) | 0.012 | 2.781 (1.245-6.213) | 0.013 | 1.036 (0.136-7.878) | 0.973 |
| Grade |  |  |  |  |  |  |
| Low | 1 (Referent) |  | 1 (Referent) |  | 1 (Referent) |  |
| Mod | 0.709 (0.129-2.398) | 0.230 | 0.732 (0.370-1.452) | 0.372 | 0.648 (0.243-1.729) | 0.387 |
| High | 0.556 (0.405-1.242) | 0.431 | 1.458 (0.326-6.517) | 0.622 | 0 | 0.981 |
| Site |  |  |  |  |  |  |
| Right colon | 1 (Referent) |  | 1 (Referent) |  | 1 (Referent) |  |
| Left colon | 0.837 (0.388-1.806) | 0.650 | 1.173 (0.479-2.870) | 0.727 | 0.192 (0.022-1.643) | 0.132 |
| Rectum | 1.048 (0.550-1.997) | 0.886 | 1.241 (0.546-2.817) | 0.606 | 0.783 (0.276-2.225) | 0.647 |
| Adjuvant therapy |  |  |  |  |  |  |
| No | 1 (Referent) |  |  |  |  |  |
| Yes | 1.305 (0.748-2.276) | 0.349 |  |  |  |  |
| pre-LMRb | 3.387 (0.469-24.465) | 0.226 | 0.644 (0.315-1.317) | 0.228 | 0.044 (0-69.188) | 0.405 |
| pos-LMRc | 2.343 (1.062-5.167) | 0.035 | 0.832 (0.429-1.612) | 0.585 | 0.309 (0.102-0.939) | 0.038 |
| pr-LMR-po change groupd |  |  |  |  |  |  |
| High-High | 1 (Referent) |  | 1 (Referent) |  | 1 (Referent) |  |
| Low-High | 3.159 (0.436-22.866) | 0.255 | 1.590 (0.520-4.860) | 0.416 | 1(0-5.33E+120) | 1 |
| High-Low | 0 | 0 | 1.155 (0.334-3.988) | 0.820 | 13403.3 (0-4.790E+108) | 0.938 |
| Low-Low | 7.102 (0.873-57.767) | 0.067 | 1.693 (0.641-4.471) | 0.288 | 9169.5 (0-3.275E+108) | 0.941 |

Notes: a Fusobacterium nucleatum negative; b preoperative lymphocyte-to-monocytes ratio; c post-treatment lymphocyte-to-monocytes ratio; d the dynamic changes of lymphocyte-to-monocytes ratio from preoperative to post-treatment.

Abbreviations: HR: hazard ratio; CI: confidence interval.

**Supplementary Table 13.** The result of the Univariate Logistic Regression Analysis with overall patients

| Variables | Univariate Analysis | | | | | |
| --- | --- | --- | --- | --- | --- | --- |
| Total Cohort | | Adjuvant Therapy Group | | Surgery Group | |
| OR (95%CI) | p*-*value | OR (95%CI) | p-value | OR (95%CI) | p-value |
| Age |  |  |  |  |  |  |
| <=70 | 1 (Referent) |  | 1 (Referent) |  | 1 (Referent) |  |
| >70 | 0.822 (0.432-1.565) | 0.551 | 1.247 (0.507-3.069) | 0.630 | 0.861 (0.304-2.436) | 0.778 |
| Gender |  |  |  |  |  |  |
| Female | 1 (Referent) |  | 1 (Referent) |  | 1 (Referent) |  |
| Male | 1.658 (1.041-2.642) | 0.033 | 1.694 (0.965-2.973) | 0.067 | 1.137 (0.464-2.787) | 0.778 |
| N stage |  |  |  |  |  |  |
| 0 | 1 (Referent) |  | 1 (Referent) |  | 1 (Referent) |  |
| 1 | 3.371 (1.970-5.766) | <0.001 | 2.743 (1.457-5.165) | 0.002 | 5.224 (1.426-19.14) | 0.013 |
| 2 | 7.255 (3.701-14.223) | <0.001 | 6.977 (3.223-15.103) | <0.001 | 2.902 (0.449-18.739) | 0.263 |
| Grade |  |  |  |  |  |  |
| High | 1 (Referent) |  | 1 (Referent) |  | 0 | 0.999 |
| Mod | 1.280 (0.473-3.462) | 0.627 | 0.587 (0.172-2.010) | 0.396 | 0.645 (0.237-1.754) | 0.39 |
| Low | 1.585 (0.557-4.510) | 0.388 | 0.648 (0.179-2.344) | 0.509 | 1 (Referent) |  |
| Site |  |  |  |  |  |  |
| Right colon | 1 (Referent) |  | 1 (Referent) |  | 1 (Referent) |  |
| Left colon | 0.856 (0.488-1.501) | 0.587 | 0.887 (0.425-1.852) | 0.749 | 0.847 (0.194-3.693) | 0.825 |
| Rectum | 0.792 (0.46-1.364) | 0.401 | 1.273 (0.655-2.474) | 0.477 | 1.226 (0.391-3.839) | 0.727 |
| f-LMRa |  |  |  |  |  |  |
| High | 1 (Referent) |  | 1 (Referent) |  | 1 (Referent) |  |
| Low | 5.264 (2.919-9.493) | <0.001 | 5.789 (2.943-11.390) | <0.001 | 8.357 (1.614-43.272) | 0.011 |
| pr-LMR-f change groupb |  |  |  |  |  |  |
| Normal group | 1 (Referent) |  | 1 (Referent) |  | 1 (Referent |  |
| First group | 1.445 (0.6-3.481) | 0.412 | 1.4 (0.51-3.843) | 0.514 | 24 (1.028-560.178) | 0.048 |
| Second group | 4.455 (1.833-10.824) | 0.001 | 4.044 (1.478-11.069) | 0.007 | 12 (1.278-112.661) | 0.030 |
| Third group | 7.318 (2.975-18) | <0.001 | 7.718 (2.847-20.923) | <0.001 | 19.2 (1.876-196.539) | 0.013 |

Notes: a lymphocyte-to-monocytes ratio of pre-end of follow-up; b the dynamic changes of lymphocyte-to-monocytes ratio from preoperative to post-treatment to pre-end follow-up.

Abbreviations: Mod, moderate; OR: Odds Ratio; CI: confidence interval.

**Supplementary Table 14.** The result of the Multivariate Logistic Regression Analysis with overall patients

| Variables | Multivariate Analysis | | | | | |
| --- | --- | --- | --- | --- | --- | --- |
| Total Cohort | | Adjuvant Therapy Group | | Surgery Group | |
| OR (95%CI) | p-value | OR (95%CI) | p-value | OR (95%CI) | p-value |
| f-LMRa |  |  |  |  |  |  |
| Gender |  |  | - |  | - |  |
| Female | 1 (Referent) |  |  |  |  |  |
| Male | 1.445 (0.76-2.747) | 0.262 |  |  |  |  |
| N stage |  |  |  |  |  |  |
| 0 | 1 (Referent) |  | 1 (Referent) |  | 1 (Referent) |  |
| 1 | 2.458 (1.248-4.841) | 0.009 | 2.243 (1.05-4.79) | 0.037 | 7.433 (0.587-92.631) | 0.119 |
| 2 | 5.109 (2.044-12.769) | <0.001 | 4.941 (1.796-13.596) | 0.002 | 2.008 (0.161-25.017) | 0.588 |
| f-LMR |  |  |  |  |  |  |
| High | 1 (Referent) |  | 1 (Referent) |  | 1 (Referent) |  |
| Low | 3.736 (1.974-7.072) | <0.001 | 4.468 (2.205-9.054) | <0.001 | 8.154 (1.434-46.354) | 0.018 |
| pr-LMR-f change groupb |  |  |  |  |  |  |
| Gender |  |  | - |  | - |  |
| Female | 1 (Referent) |  |  |  |  |  |
| Male | 1.443 (0.756-2.752) | 0.266 |  |  |  |  |
| N stage |  |  |  |  |  |  |
| 0 | 1 (Referent) |  | 1 (Referent) |  | 1 (Referent) |  |
| 1 | 2.908 (1.47-5.754) | 0.002 | 2.713 (1.268-5.806) | 0.010 | 3.859 (0.367-40.631) | 0.261 |
| 2 | 5.497 (2.198-13.748) | <0.001 | 7.502 (1.865-13.874) | 0.001 | 2.71 (0.196-37.522) | 0.457 |
| pr-LMR-f change group |  |  |  |  |  |  |
| Normal group | 1 (Referent) |  | 1 (Referent) |  | 1 (Referent) |  |
| First group | 1.288 (0.304-5.455) | 0.640 | 1.376 (0.48-3.945) | 0.553 | 16.518 (0.636-428.817) | 0.091 |
| Second group | 3.611 (1.381-9.438) | 0.009 | 3.364 (1.161-9.745) | 0.025 | 8.855 (0.885-88.611) | 0.063 |
| Third group | 4.947 (1.878-13.031) | 0.001 | 6.132 (2.141-17.562) | 0.001 | 16.216 (1.552-169.442) | 0.02 |

Notes: a lymphocyte-to-monocytes ratio of pre-end of follow-up; b the dynamic changes of lymphocyte-to-monocytes ratio from preoperative to post-treatment to pre-end of follow-up.

Abbreviations: OR: Odds Ratio; CI: confidence interval.

**Supplementary Table 15.** The result of the Univariate Logistic Regression Analysis with Fn-negativea

| Variables | Univariate Analysis | | | | | |
| --- | --- | --- | --- | --- | --- | --- |
| Total Cohort | | Adjuvant Therapy Group | | Surgery Group | |
| OR (95%CI) | p-value | OR (95%CI) | p-value | OR (95%CI) | p-value |
| Age |  |  |  |  |  |  |
| <=70 | 1 (Referent) |  | 1 (Referent) |  | 1 (Referent) |  |
| >70 | 0.753 (0.317-1.792) | 0.522 | 0.791 (0.198-3.153) | 0.739 | 0.841 (0.256-2.763) | 0.776 |
| Gender |  |  |  |  |  |  |
| Female | 1 (Referent) |  | 1 (Referent) |  | 1 (Referent) |  |
| Male | 1.666 (0.881-3.15) | 0.116 | 1.847 (0.831-4.107) | 0.132 | 1.3 (0.442-3.827) | 0.634 |
| N stage |  |  |  |  |  |  |
| 0 | 1 (Referent) |  | 1 (Referent) |  | 1 (Referent) |  |
| 1 | 2.181 (1.065-4.467) | 0.033 | 2.066 (0.867-4.924) | 0.102 | 4.929 (0.747-32.512) | 0.097 |
| 2 | 2.952 (1.222-7.133) | 0.016 | 3.615 (12.82-10.2) | 0.015 | 1.095 (0.105-11.38) | 0.939 |
| Grade |  |  |  |  |  |  |
| High | 1 (Referent) |  | 1 (Referent) |  | 0 | 0.999 |
| Mod | 1.357 (0.27-6.827) | 0.711 | 0.413 (0.055-3.088) | 0.413 | 0.629 (0.191-2.069) | 0.445 |
| Low | 1.969 (0.369-10.502) | 0.428 | 0.571 (0.071-4.594) | 0.599 | 1 (Referent) |  |
| Site |  |  |  |  |  |  |
| Right colon | 1 (Referent) |  | 1 (Referent) |  | 1 (Referent) |  |
| Left colon | 0.769 (0.311-1.9) | 0.57 | 1.111 (0.383-3.224) | 0.846 | 0.167 (0.017-1.6710) | 0.128 |
| Rectum | 1.086 (0.5-2.356) | 0.835 | 1.282 (0.481-3.42) | 0.62 | 0.828 (0.233-2.938) | 0.77 |
| f-LMRb |  |  |  |  |  |  |
| High | 1 (Referent) |  | 1 (Referent) |  | 1 (Referent) |  |
| Low | 2.364 (1.061-5.267) | 0.035 | 1.453 (0.65-3.246) | 0.362 | 1.896 (0.770-4.665) | 0.164 |
| pr-LMR-f change groupc |  |  |  |  |  |  |
| normal group | 1 (Referent) |  | 1 (Referent) |  | 1 (Referent) |  |
| first group | 33.478 (0.388-31.201) | 0.265 | 1.5 (0.361-6.23) | 0.577 | - | 0.999 |
| second group | 13.333 (1.280-138.845) | 0.030 | 2.955 (0.721-12.107) | 0.132 | - | 0.999 |
| third group | 15.0 (0.663-339.548) | 0.089 | 3.333 (0.785-14.156) | 0.103 | - | 0.999 |

Notes: a Fusobacterium nucleatum negative; b lymphocyte-to-monocytes ratio of pre-end of follow-up; c the dynamic changes of lymphocyte-to-monocytes ratio from preoperative to post-treatment to pre-end of follow-up.

Abbreviations: CI: Confidence Interval; OR: Odds Ratio.

**Supplementary Table 16.** The result of the Multivariate Logistic Regression Analysis in the Fn-negativea CRC patients

| Variables | Multivariate Analysis | |
| --- | --- | --- |
| Total Cohort | |
| OR (95%CI) | p-value |
| f-LMRb |  |  |
| N stage |  |  |
| 0 | 1 (Referent) |  |
| 1 | 1.885 (0.77-4.614) | 0.165 |
| 2 | 2.775 (0.882-8.737) | 0.081 |
| f-LMR |  |  |
| High | 1 (Referent) |  |
| Low | 2.541 (1.106-5.837) | 0.028 |
| pr-LMR-f change groupc |  |  |
| N stage |  |  |
| 0 | 1 (Referent) |  |
| 1 | 1.452 (0.582-3.626) | 0.424 |
| 2 | 2.656 (0.83-8.498) | 0.1 |
| pr-LMR-f change group |  |  |
| normal group | 1 (Referent) |  |
| first group | 3.036 (0.333-27.655) | 0.324 |
| second group | 11.54 (1.096-121.548) | 0.042 |
| third group | 14.07 (0.595-332.719) | 0.101 |

Notes: a Fusobacterium nucleatum negative; b lymphocyte-to-monocytes ratio of pre-end of follow-up; c the dynamic changes of lymphocyte-to-monocytes ratio from preoperative to post-treatment to pre-end of follow-up.

Abbreviations: OR, hazard ratio; CI, confidence interval.

**
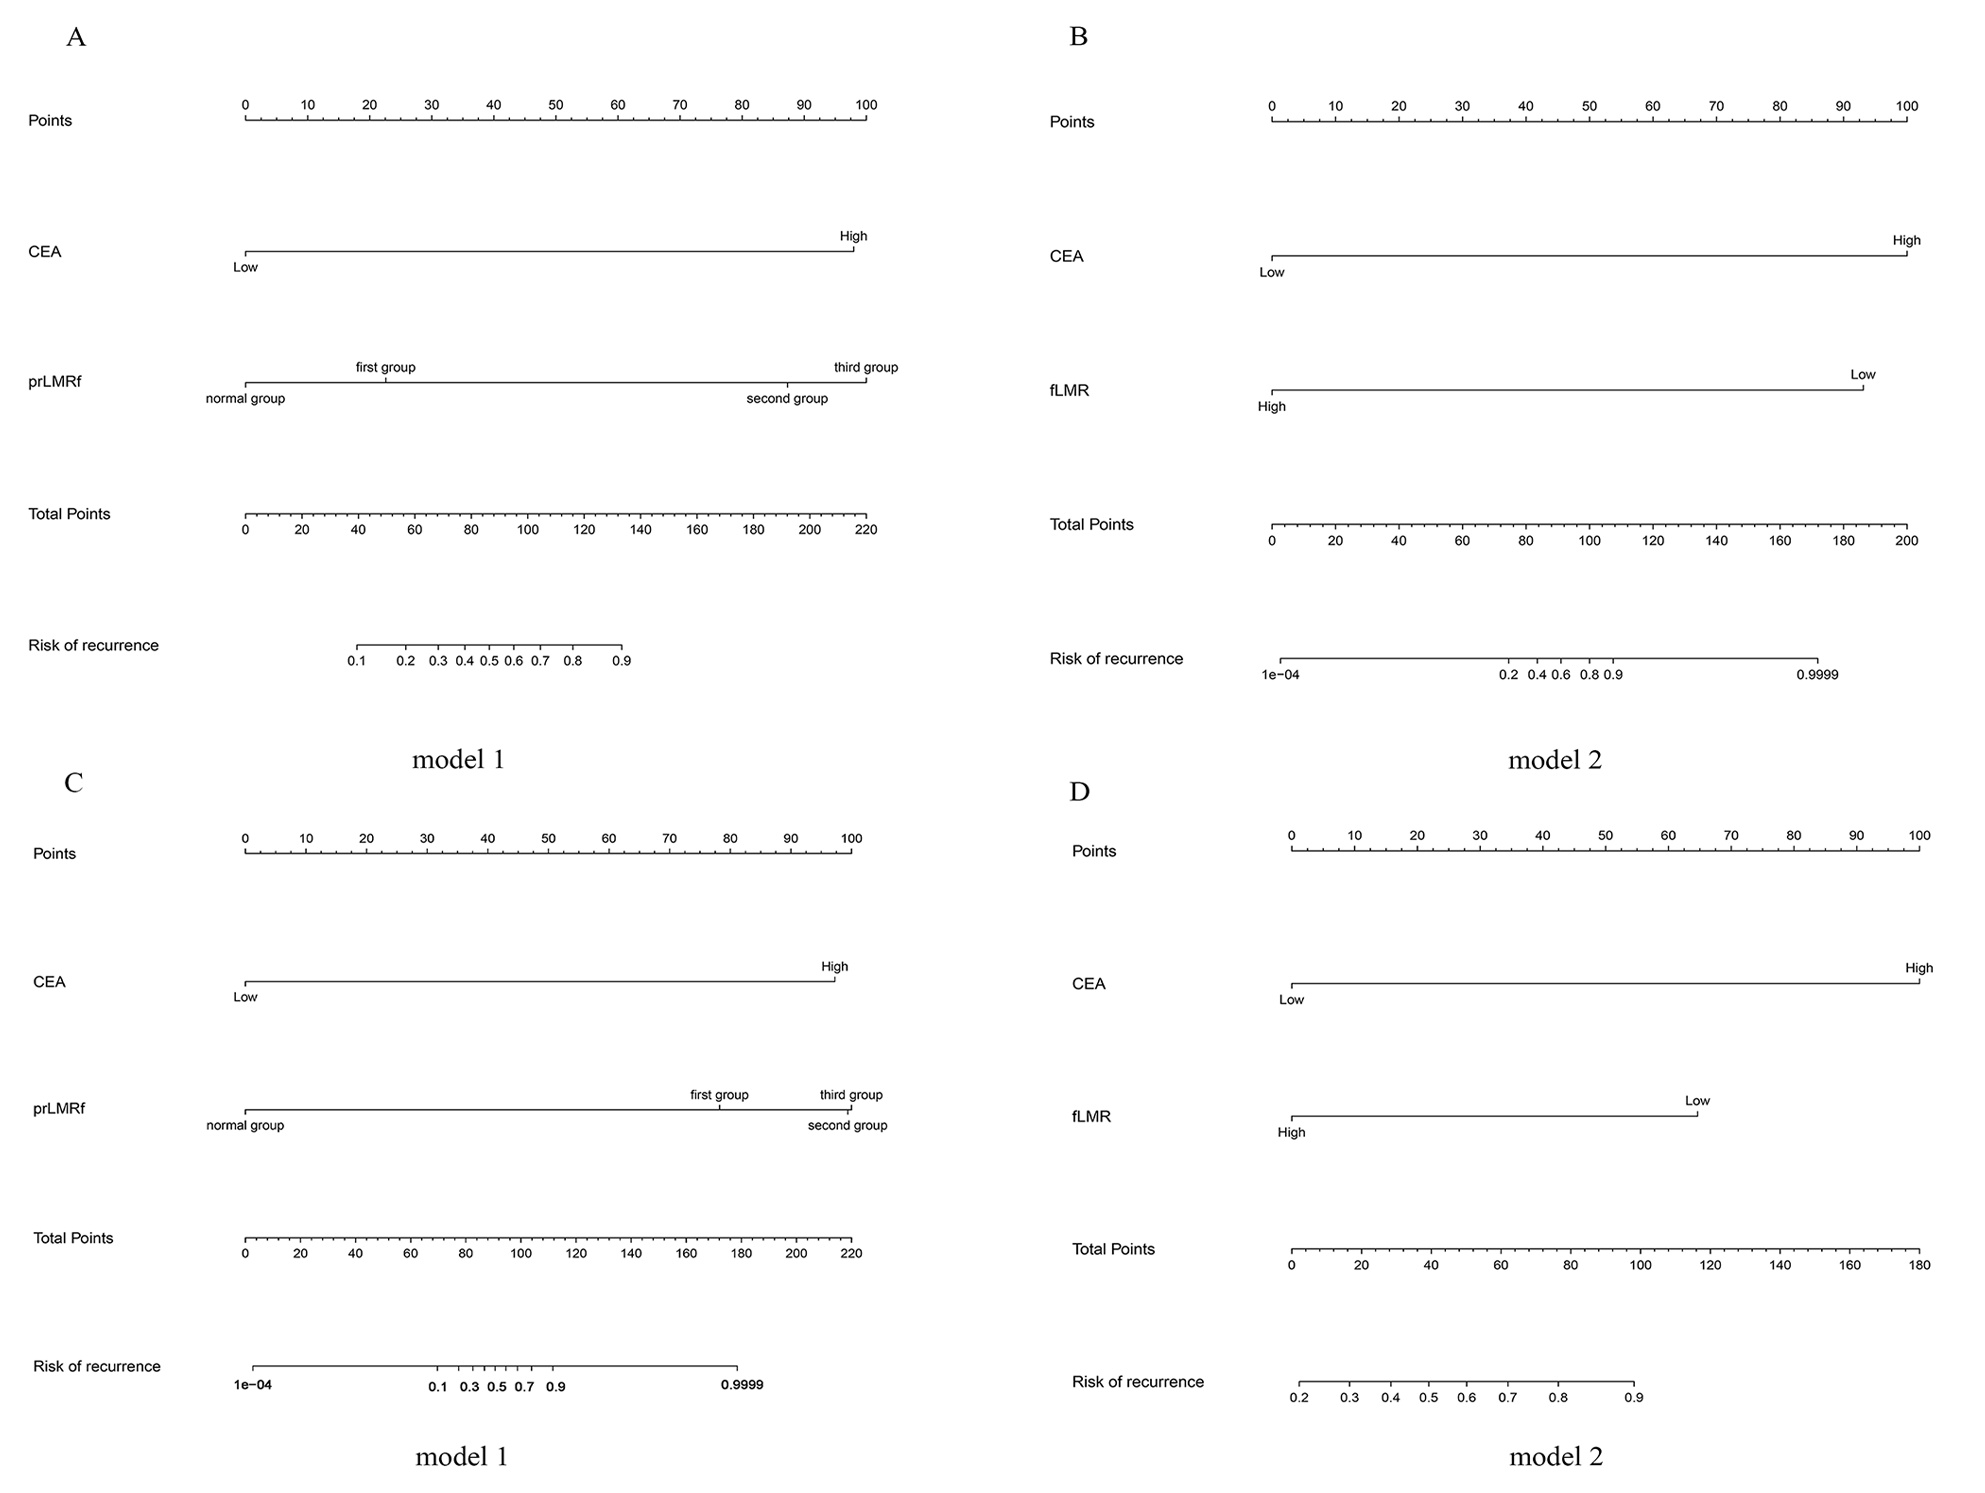
**

**Supplementary Figure 1.** Nomogram plots of the predictive model

Notes: (A) Nomogram plot of model 1 in the total cohort of Fn-positive CRC patients. (B) Nomogram plot of model 2 in the total cohort of Fn-positive CRC patients. (C) Nomogram plot of model 1 in the adjuvant therapy group of Fn-positive CRC patients. (D) Nomogram plot of model 2 in the adjuvant therapy group of Fn-positive CRC patients.

Abbreviations: f-LMR, lymphocyte-monocyte ratio at the end of follow-up; pr-LMR-f, pre-treatment-post-treatment-the end of follow-up changes in lymphocyte-monocyte ratio; Fn, Fusobacterium nucleatum; model1: CEA+ pr-LMR-f; model2, CEA+ f-LMR.

**
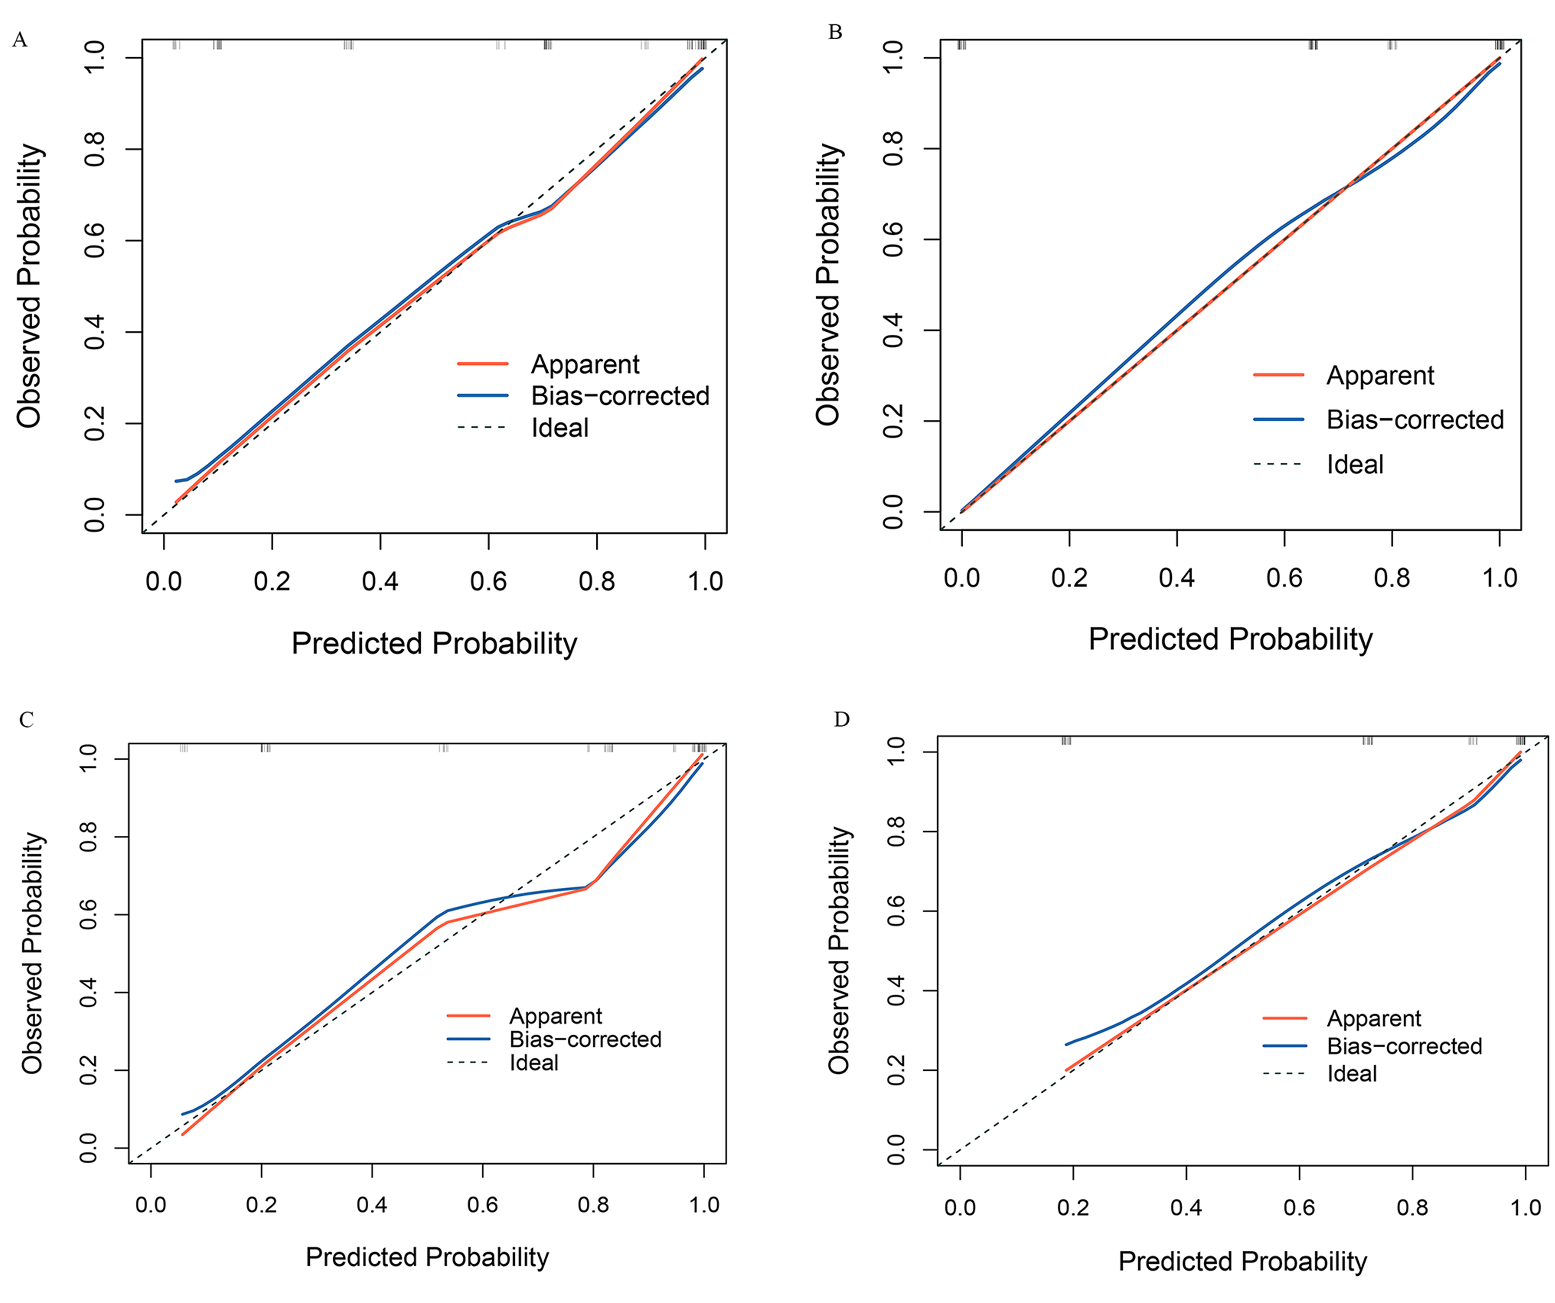
Supplementary Figure 2.** Calibration curves of the predictive models in the total cohort and adjuvant therapy group

Notes: (A) Calibration curves of model 1 and (B) model 2 in the total cohort of Fn-positive CRC patients. (C) Calibration curves of model 1 and (D) model 2 in the adjuvant therapy group of Fn-positive CRC patients. Model 1, CEA + pr-LMR-f; Model 2, CEA + f-LMR.

Abbreviations: f-LMR, lymphocyte-monocyte ratio at the end of follow-up; pr-LMR-f, pre-treatment-post-treatment-the end of follow-up changes in lymphocyte-monocyte ratio; Fn, Fusobacterium nucleatum; CRC, colorectal cancer.


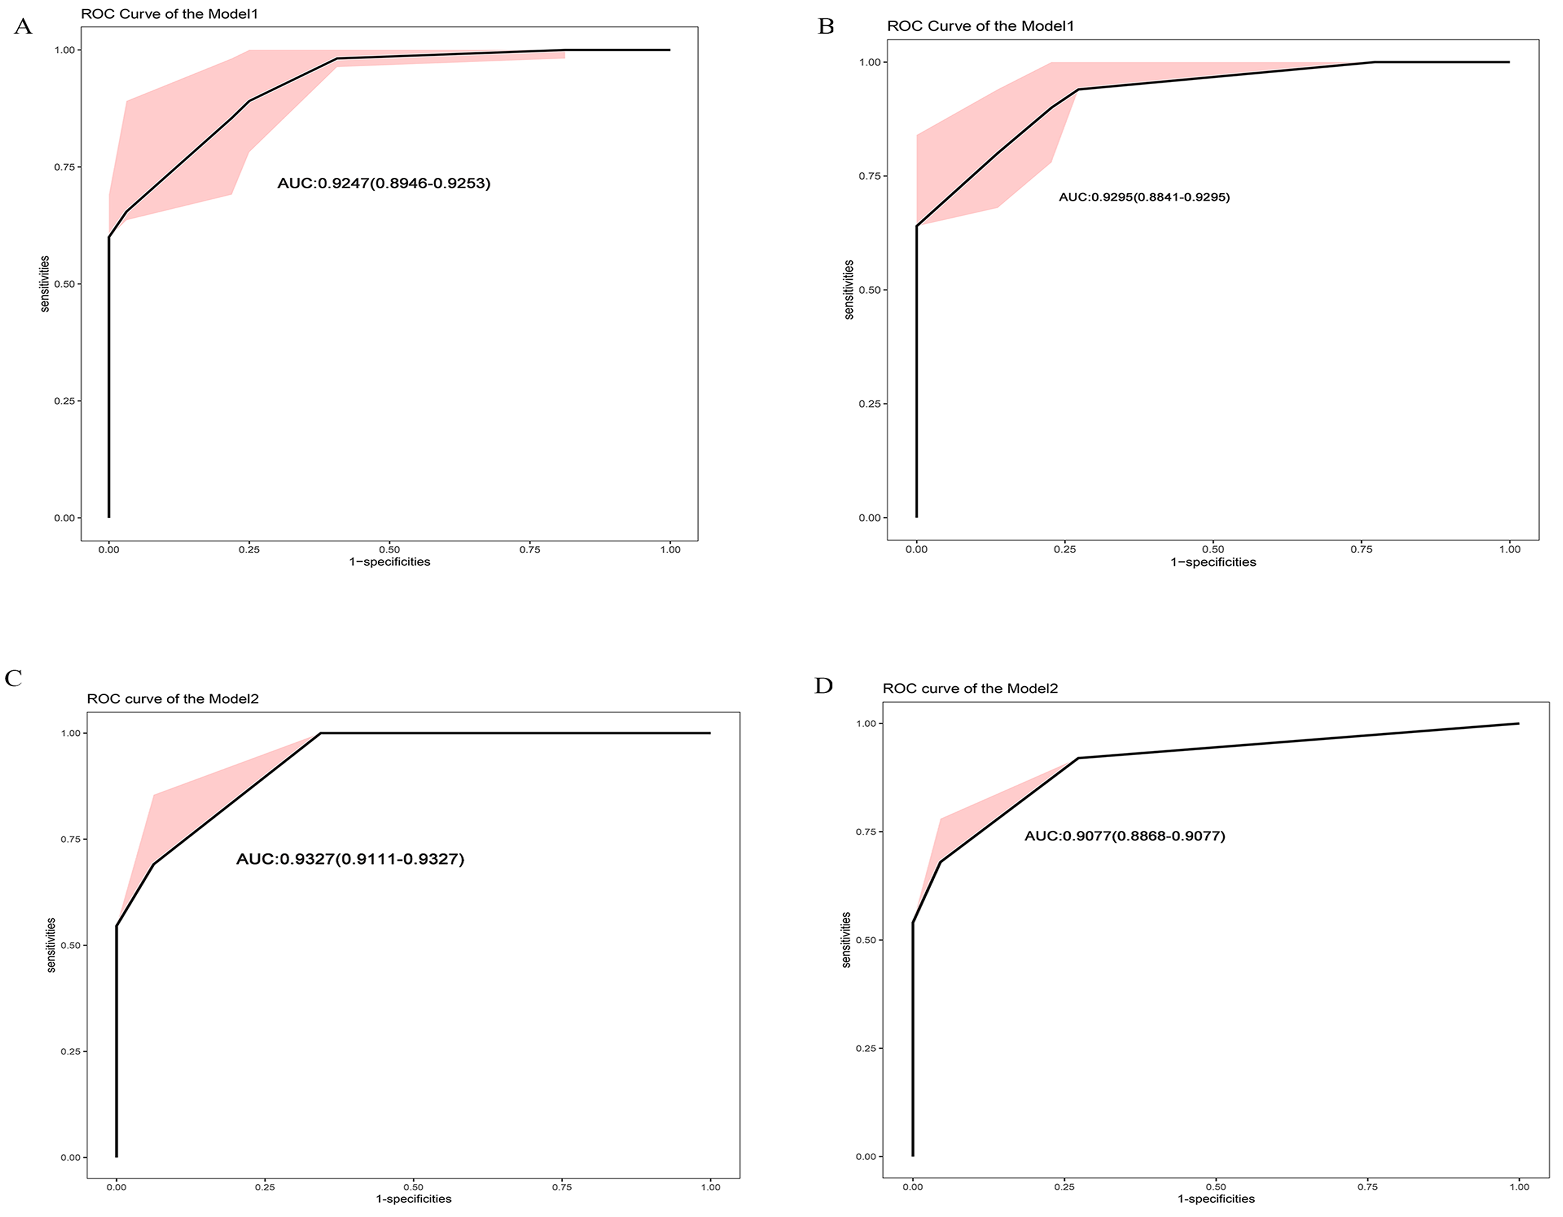


**Supplementary Figure 3.** ROC curve analysis results of the predictive models in the total cohort and adjuvant therapy group

Notes: (A) Predictive model 1 in the total cohort of Fn-positive CRC patients; (B) Predictive model 1 in the adjuvant therapy group of Fn-positive CRC patients; (C) Predictive model 2 in the total cohort of Fn-positive CRC patients; (D) Predictive model 2 in the adjuvant therapy group of Fn-positive CRC patients. Model 1: CEA + pr-LMR-f; Model 2: CEA + f-LMR.

Abbreviations: ROC, receiver operating characteristic; CI, confidence interval; CRC, colorectal cancer; f-LMR, lymphocyte-monocyte ratio at the end of follow-up; pr-LMR-f, pre-treatment-post-treatment-the end of follow-up changes in lymphocyte-monocyte ratio; Fn, Fusobacterium nucleatum.
